# Supplementary material for: Analysis of genomic and immune intratumor heterogeneity in linitis plastica via multiregional exome and T‐cell receptor sequencing
Source: PubMed Central journal article supplement (PMC10399711; doi:10.1002/1878-0261.13381), 2023-03-07
Supplement: MOL2-17-1531-s002.pdf [file MOL2-17-1531-s002.pdf]

Supplementary Table S2. Quality control of the whole exome sequencing data.

| Sample | Type   | Average sequencing depth on target | Mapped reads on target | Total mapped reads | Total reads pass low quality check | Uniquely mapped reads on target | Total uniquely mapped reads | Fraction of target covered with $\geq 10x$ | Fraction of target covered with $\geq 50x$ |
|--------|--------|------------------------------------|------------------------|--------------------|------------------------------------|---------------------------------|-----------------------------|--------------------------------------------|--------------------------------------------|
| P1     | normal | 253.3                              | 207954196              | 306554728          | 317061160                          | 160986295                       | 238893474                   | 99.38%                                     | 97.47%                                     |
| P1_R1  | cancer | 245.29                             | 203043161              | 267587542          | 276587084                          | 153560872                       | 202845633                   | 99.51%                                     | 97.10%                                     |
| P1_R2  | cancer | 293.23                             | 240455467              | 342444831          | 352497814                          | 185458750                       | 263426451                   | 99.57%                                     | 98.06%                                     |
| P1_R3  | cancer | 285.76                             | 236342106              | 347700305          | 358707646                          | 181919270                       | 266884107                   | 99.50%                                     | 98.04%                                     |
| P1_R4  | cancer | 333.54                             | 297252971              | 426200683          | 440483402                          | 210984307                       | 302169686                   | 99.58%                                     | 98.46%                                     |
| P1_R5  | cancer | 242.15                             | 216083688              | 303928783          | 313010856                          | 153085712                       | 214330817                   | 99.51%                                     | 97.00%                                     |
| P1_R6  | cancer | 261.85                             | 223668055              | 313676312          | 322923060                          | 165501762                       | 231122112                   | 99.54%                                     | 97.38%                                     |
| P1_R7  | cancer | 271.7                              | 233988040              | 325257174          | 337605762                          | 171272786                       | 237543652                   | 99.59%                                     | 97.74%                                     |
| P1_R8  | cancer | 298.71                             | 274906589              | 385123050          | 396937678                          | 189382968                       | 264071505                   | 99.57%                                     | 98.05%                                     |
| P1_R9  | cancer | 244.6                              | 203753984              | 280229685          | 290091598                          | 154055023                       | 211222491                   | 99.52%                                     | 97.25%                                     |
| P1_R10 | cancer | 254.1                              | 206006060              | 303802271          | 313560254                          | 161317858                       | 237010680                   | 99.51%                                     | 97.51%                                     |
| P2     | normal | 254.35                             | 229284865              | 330044037          | 341498682                          | 159841035                       | 237832289                   | 99.46%                                     | 97.31%                                     |
| P2_R1  | cancer | 319.33                             | 267457337              | 371722853          | 383519276                          | 201246959                       | 280108289                   | 99.66%                                     | 98.51%                                     |
| P2_R2  | cancer | 269.48                             | 220175335              | 310789123          | 320600460                          | 171101892                       | 241513149                   | 99.60%                                     | 97.98%                                     |
| P2_R3  | cancer | 257.37                             | 205881530              | 297578729          | 305017926                          | 163574774                       | 236097399                   | 99.56%                                     | 97.72%                                     |
| P2_R4  | cancer | 264.77                             | 214252133              | 300624140          | 310388980                          | 167190587                       | 234427030                   | 99.60%                                     | 97.64%                                     |
| P2_R5  | cancer | 262.98                             | 217664450              | 310409719          | 315165408                          | 167203530                       | 237518727                   | 99.52%                                     | 97.43%                                     |
| P2_R6  | cancer | 299.14                             | 250312304              | 355617602          | 366636750                          | 189676233                       | 269509795                   | 99.55%                                     | 98.18%                                     |
| P2_R7  | cancer | 305.61                             | 245656296              | 343061681          | 354922330                          | 192519858                       | 270118557                   | 99.55%                                     | 98.18%                                     |
| P2_R8  | cancer | 298.86                             | 251590774              | 348114519          | 358439122                          | 188192521                       | 261365885                   | 99.58%                                     | 98.07%                                     |
| P2_R9  | cancer | 261.98                             | 208434904              | 286389278          | 295507860                          | 164605876                       | 226705442                   | 99.57%                                     | 97.42%                                     |
| P2_R10 | cancer | 259.53                             | 217323291              | 303075997          | 313354378                          | 164200574                       | 230067340                   | 99.55%                                     | 97.73%                                     |
| P3     | normal | 267.82                             | 226485667              | 367795564          | 378430776                          | 169385476                       | 271521842                   | 97.52%                                     | 85.19%                                     |
| P3_R1  | cancer | 270.66                             | 244765177              | 348809814          | 353674753                          | 170092631                       | 240722998                   | 92.22%                                     | 78.24%                                     |
| P3_R2  | cancer | 233.99                             | 207656261              | 372974272          | 388904552                          | 146277807                       | 256097312                   | 95.41%                                     | 76.61%                                     |
| P3_R3  | cancer | 355.01                             | 317261109              | 425684435          | 434348273                          | 222446779                       | 297635170                   | 97.86%                                     | 91.71%                                     |
| P3_R4  | cancer | 290.12                             | 269816473              | 396374723          | 402862699                          | 185115558                       | 271053119                   | 99.59%                                     | 98.17%                                     |
| P3_R5  | cancer | 226.19                             | 206051399              | 277637318          | 279436532                          | 144497619                       | 193417316                   | 99.44%                                     | 96.54%                                     |
| P3_R6  | cancer | 206.56                             | 202461324              | 277034128          | 279657043                          | 131290239                       | 178536084                   | 97.74%                                     | 87.23%                                     |
| P3_R7  | cancer | 294.47                             | 304257283              | 399052096          | 405069686                          | 187220057                       | 244709825                   | 99.55%                                     | 98.10%                                     |
| P3_R8  | cancer | 255.01                             | 261497461              | 442419869          | 453013974                          | 162387443                       | 271840731                   | 96.18%                                     | 83.68%                                     |
| P3_R9  | cancer | 291.15                             | 270933244              | 358066419          | 362723278                          | 181032339                       | 237559852                   | 96.04%                                     | 88.25%                                     |
| P3_R10 | cancer | 264.86                             | 253400502              | 324277777          | 328630269                          | 164799117                       | 210260949                   | 99.49%                                     | 96.07%                                     |
| P4     | normal | 112.02                             | 89254104               | 129747883          | 129891598                          | 78162121                        | 112995040                   | 98.56%                                     | 82.28%                                     |
| P4_R1  | cancer | 419.07                             | 355538777              | 484222019          | 485543599                          | 293708671                       | 399505884                   | 99.76%                                     | 99.07%                                     |
| P4_R2  | cancer | 390.36                             | 331196527              | 470818300          | 472013529                          | 275033761                       | 390202865                   | 99.75%                                     | 98.93%                                     |
| P4_R3  | cancer | 407.13                             | 354468376              | 479466745          | 480590389                          | 286222960                       | 386987629                   | 99.72%                                     | 98.84%                                     |
| P4_R4  | cancer | 378.23                             | 323102990              | 437713878          | 438967400                          | 264417650                       | 358068840                   | 99.75%                                     | 98.91%                                     |
| P4_R5  | cancer | 428.01                             | 361780003              | 517108919          | 518305280                          | 300917121                       | 429389369                   | 99.75%                                     | 99.02%                                     |
| P4_R6  | cancer | 362.69                             | 311820560              | 420098099          | 421121638                          | 255432742                       | 344255529                   | 99.72%                                     | 98.69%                                     |
| P4_R7  | cancer | 366.22                             | 315215700              | 420971737          | 421972557                          | 256340265                       | 342318549                   | 99.74%                                     | 98.86%                                     |
| P4_R8  | cancer | 396.86                             | 333451584              | 447664107          | 448966500                          | 278312914                       | 373250845                   | 99.75%                                     | 99.01%                                     |
| P4_R9  | cancer | 324                                | 277715235              | 364807324          | 365778819                          | 226588847                       | 297583050                   | 99.73%                                     | 98.65%                                     |
| P4_R10 | cancer | 388.29                             | 330633385              | 449956325          | 451121188                          | 271772542                       | 369906464                   | 99.75%                                     | 98.94%                                     |

\*note: normal represents the peripheral blood as control
